# Supplementary material for: Molecular probes for selective detection of cysteine cathepsins
Source: Royal Society of Chemistry journal article supplement (doi:10.1039/d1ob00225b), 2021-01-01
Supplement: d1ob00225b1.pdf [file d1ob00225b1.pdf]

## **Molecular probes for selective detection of cysteine cathepsins**

Kelton A. Schleyer and Lina Cui\*

Department of Medicinal Chemistry, College of Pharmacy, University of Florida,  
1345 Center Dr, Gainesville, FL 32610 USA

*\*Correspondence should be addressed to [linacui@cop.ufl.edu](mailto:linacui@cop.ufl.edu).*

### **SUPPLEMENTARY INFORMATION**

# Dye and Quencher Structures

A

## Dyes

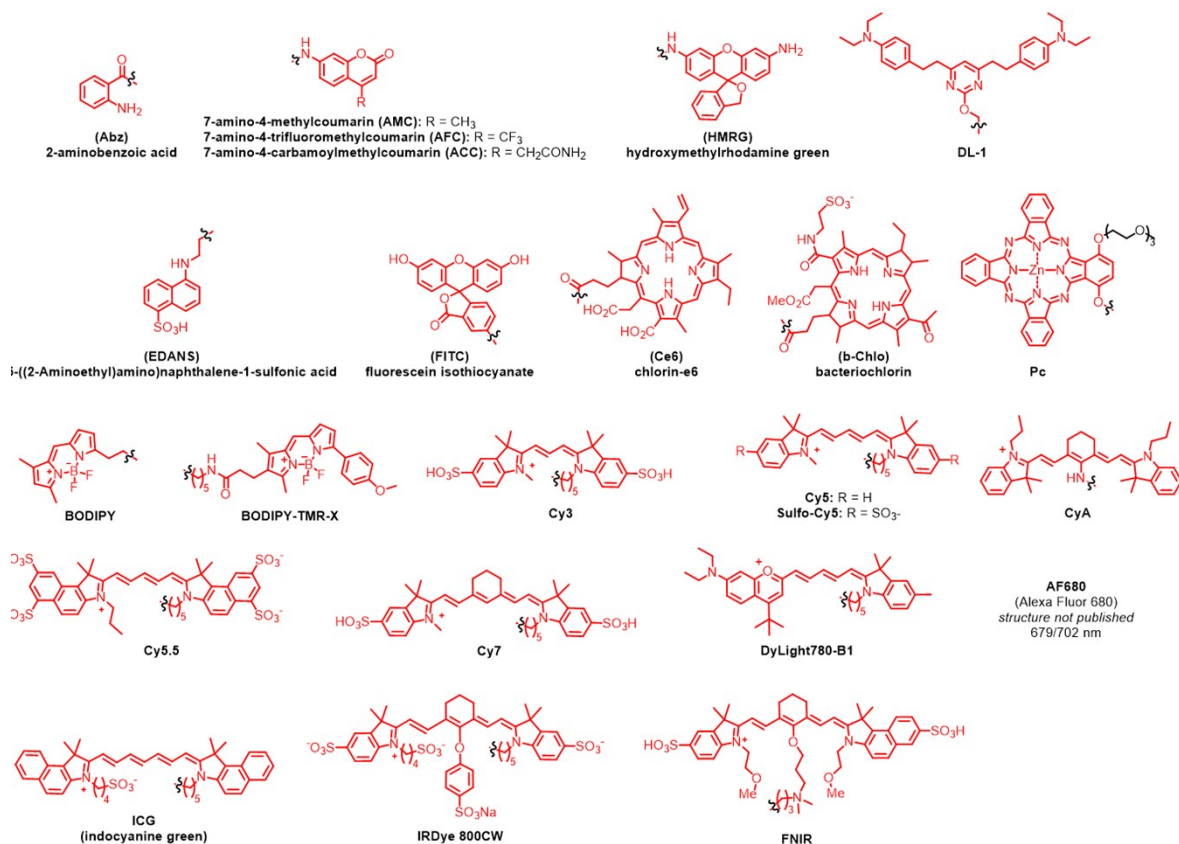

B

## Quenchers

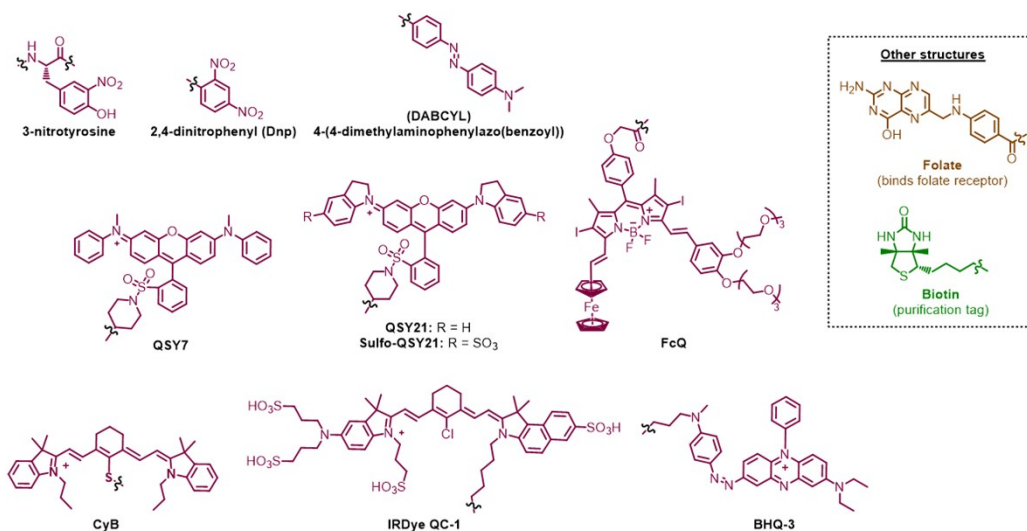

**SUPPLEMENTARY CHART 1** Structures of dyes, quenchers, and other structures mentioned in this text. For other structures, please see references in the main text.
